# Supplementary material for: 3D printable diffractive optical elements by liquid immersion
Source: PubMed Central journal article supplement (PMC8144415; doi:10.1038/s41467-021-23279-6), 2021-05-24
Supplement: 41467_2021_23279_MOESM3_ESM.pdf [file 41467_2021_23279_MOESM3_ESM.pdf]

## **Description of Additional Supplementary Files**

Supplementary Movie 1: Super-resolution reconstruction of mitochondria

Supplementary Movie 2: Super-resolution reconstruction of microtubules
